# Supplementary material
Source: publisher figshare collection journal article supplement (https://sage.figshare.com/ndownloader/files/15685157)
Supplement: Supplementary file 1 [file 15685157]

**Supplementary Material: Electoral management and the organisational determinants of electoral integrity: Introduction**

**Appendix A: Countries Studied**

| COUNTRY                           | STRUCTURAL SURVEY                                                                            |              | PERSONNEL SURVEY     |              |
|-----------------------------------|----------------------------------------------------------------------------------------------|--------------|----------------------|--------------|
|                                   | Participating EMB (English translation):                                                     | Surveyed by: | Number of Responses: | Surveyed by: |
| <b>AFGHANISTAN</b>                | Independent Election Commission                                                              | ELECT        | Did Not Participate  | N/A          |
| <b>ALBANIA</b>                    | Central Election Commission                                                                  | EMS          | 9                    | EMS          |
| <b>ARGENTINA</b>                  | National Electoral Directorate                                                               | ELECT        | Did Not Participate  | N/A          |
| <b>BAHAMAS, THE</b>               | Parliamentary Registration Department                                                        | ELECT        | Did Not Participate  | N/A          |
| <b>BELARUS</b>                    | Central Commission for Elections and Conduct of Republican Referendums                       | EMS          | Did Not Participate  | N/A          |
| <b>BELGIUM</b>                    | Federal Public Service - Directorate General Institutions and Population - Service Elections | EMS          | 3                    | EMS          |
| <b>BELIZE</b>                     | Did Not Participate                                                                          | N/A          | 7                    | EMS          |
| <b>BENIN</b>                      | Did Not Participate                                                                          | N/A          | 9                    | ELECT        |
| <b>BHUTAN</b>                     | Election Commission of Bhutan                                                                | ELECT        | Did Not Participate  | N/A          |
| <b>BOSNIA AND HERZEGOVINA</b>     | Central Election Commission                                                                  | EMS          | 52                   | EMS          |
| <b>BRAZIL</b>                     | Did Not Participate                                                                          | N/A          | 1                    | EMS          |
| <b>BULGARIA</b>                   | Central Election Commission                                                                  | EMS          | 2                    | EMS          |
| <b>BURKINA FASO</b>               | Independent National Electoral Commission                                                    | EMS          | 2                    | EMS          |
| <b>CAMBODIA</b>                   | National Election Committee                                                                  | ELECT        | Did Not Participate  | N/A          |
| <b>CAMEROON</b>                   | Did Not Participate                                                                          | N/A          | 1                    | EMS          |
| <b>CANADA</b>                     | Elections Canada                                                                             | ELECT        | Did Not Participate  | N/A          |
| <b>CONGO, DEMOCRATIC REPUBLIC</b> | Did Not Participate                                                                          | N/A          | 21                   | ELECT        |
| <b>COSTA RICA</b>                 | Supreme Court of Elections                                                                   | ELECT        | 1                    | EMS          |
| <b>COTE D'IVOIRE</b>              | Independent Electoral Commission                                                             | ELECT        | Did Not Participate  | N/A          |
| <b>CROATIA</b>                    | State Election Commission                                                                    | EMS          | 529                  | EMS          |
| <b>CZECH REPUBLIC</b>             | Statistical Office                                                                           | EMS          | 1                    | EMS          |
| <b>DENMARK</b>                    | Ministry of Economic Affairs and the Interior                                                | EMS          | 34                   | EMS          |
| <b>DOMINICA</b>                   | Electoral Office                                                                             | ELECT        | Did Not Participate  | N/A          |
| <b>ECUADOR</b>                    | Contentious Electoral Court                                                                  | EMS          | 13                   | EMS          |
| <b>ESTONIA</b>                    | National Electoral Committee                                                                 | EMS          | Did Not Participate  | N/A          |
| <b>FINLAND</b>                    | Ministry of Justice                                                                          | EMS          | 22                   | EMS          |
| <b>GEORGIA</b>                    | Did Not Participate                                                                          | N/A          | 19                   | ELECT        |

|                            |                                                                             |                    |                     |       |
|----------------------------|-----------------------------------------------------------------------------|--------------------|---------------------|-------|
| <b>GHANA</b>               | Electoral commission                                                        | ELECT              | 8                   | EMS   |
| <b>GREECE</b>              | Ministry of the Environment/Election Directorate                            | EMS                | 1                   | EMS   |
| <b>GUAM</b>                | Election Commission                                                         | ELECT              | Did Not Participate | N/A   |
| <b>GUINEA</b>              | Independent National Electoral Commission                                   | ELECT              | Did Not Participate | N/A   |
| <b>HUNGARY (2)</b>         | National Election Commission, National Election Office                      | EMS                | 15                  | EMS   |
| <b>ICELAND</b>             | Department of Housing, Planning, Community and Local Government             | EMS                | Did Not Participate | N/A   |
| <b>INDONESIA</b>           | Election Commission for West Java Province                                  | ELECT              | Did Not Participate | N/A   |
| <b>IRAQ</b>                | Independent High Electoral Commission                                       | ELECT              | 4                   | ELECT |
| <b>IRELAND</b>             | Did Not Participate                                                         | N/A                | 37                  | EMS   |
| <b>ISRAEL</b>              | Central Elections Committee                                                 | EMS                | Did Not Participate | N/A   |
| <b>JORDAN</b>              | Independent Electoral Commission                                            | EMS                | Did Not Participate | N/A   |
| <b>KENYA</b>               | Independent Electoral and Boundaries Commission                             | ELECT              | 1                   | EMS   |
| <b>KOREA, REP.</b>         | National Election Commission                                                | ELECT              | 245                 | ELECT |
| <b>KYRGYZ REPUBLIC (2)</b> | Central Commission for Election and Referendums; State Registration Service | Both EMS and ELECT | 25                  | EMS   |
| <b>LATVIA</b>              | Central Election Commission                                                 | EMS                | 1                   | EMS   |
| <b>LIBYA</b>               | Did Not Participate                                                         | N/A                | 10                  | ELECT |
| <b>LUXEMBOURG</b>          | Government Centralizing Office                                              | EMS                | Did Not Participate | N/A   |
| <b>MALAWI</b>              | Electoral Commission                                                        | ELECT              | 2                   | EMS   |
| <b>MALDIVES</b>            | Elections Commission                                                        | ELECT              | 10                  | ELECT |
| <b>MALTA</b>               | Electoral Commission                                                        | EMS                | 16                  | EMS   |
| <b>MAURITIUS</b>           | Office of the Electoral Commissioner                                        | EMS                | 12                  | EMS   |
| <b>MEXICO</b>              | National Electoral Institute                                                | ELECT              | 357                 | ELECT |
| <b>MOLDOVA</b>             | Central Electoral Commission                                                | EMS                | 17                  | EMS   |
| <b>MONGOLIA</b>            | General Election Commission                                                 | ELECT              | 5                   | ELECT |
| <b>MOZAMBIQUE</b>          | National Commission of Elections                                            | ELECT              | 3                   | ELECT |
| <b>NAMIBIA</b>             | Did Not Participate                                                         | N/A                | 1                   | EMS   |
| <b>NETHERLANDS (2)</b>     | Electoral Council; Ministry of the Interior and Kingdom Relations           | EMS                | 66                  | EMS   |
| <b>NEW ZEALAND</b>         | Electoral Commission                                                        | ELECT              | Did Not Participate | N/A   |
| <b>NIGERIA</b>             | Did Not Participate                                                         | N/A                | 2                   | EMS   |
| <b>NORWAY (2)</b>          | Directorate of Elections; Municipal and Modernization Department            | EMS                | 65                  | EMS   |
| <b>PALESTINE</b>           | Central Elections Commission                                                | ELECT              | 6                   | ELECT |
| <b>PANAMA</b>              | Tribunal Electoral                                                          | ELECT              | 1                   | EMS   |
| <b>PERU</b>                | National Election Jury                                                      | ELECT              | Did Not Participate | N/A   |
| <b>PHILIPPINES</b>         | Commission on Elections                                                     | EMS                | 25                  | ELECT |
| <b>POLAND</b>              | State Electoral Commission, National Electoral Office                       | EMS                | Did Not Participate | N/A   |
| <b>PORTUGAL</b>            | Did Not Participate                                                         | N/A                | 12                  | EMS   |

|                              |                                                                                                                                                                                              |       |                     |       |
|------------------------------|----------------------------------------------------------------------------------------------------------------------------------------------------------------------------------------------|-------|---------------------|-------|
| <b>ROMANIA</b>               | Permanent Electoral Authority                                                                                                                                                                | EMS   | 11                  | EMS   |
| <b>RUSSIAN FEDERATION</b>    | Central Election Commission                                                                                                                                                                  | EMS   | Did Not Participate | N/A   |
| <b>RWANDA</b>                | National Electoral Commission                                                                                                                                                                | ELECT | Did Not Participate | N/A   |
| <b>SAMOA</b>                 | Office of the Electoral Commissioner                                                                                                                                                         | ELECT | Did Not Participate | N/A   |
| <b>SAO TOME AND PRINCIPE</b> | TElect-STP                                                                                                                                                                                   | ELECT | Did Not Participate | N/A   |
| <b>SENEGAL</b>               | National Election Commission                                                                                                                                                                 | ELECT | Did Not Participate | N/A   |
| <b>SIERRA LEONE</b>          | National Electoral Commission                                                                                                                                                                | ELECT | 1                   | EMS   |
| <b>SLOVAK REPUBLIC</b>       | State Commission on Election and Control of Funding of Political Parties                                                                                                                     | EMS   | Did Not Participate | N/A   |
| <b>SOUTH SUDAN</b>           | Did Not Participate                                                                                                                                                                          | N/A   | 3                   | ELECT |
| <b>SPAIN (3)</b>             | Ministry of Interior. Directorate General of Internal Policy. Deputy Directorate General of Internal Policy and Electoral Processes; Office of the Electoral Census; Central Electoral Board | EMS   | Did Not Participate | N/A   |
| <b>ST. LUCIA</b>             | Saint Lucia Electoral Department                                                                                                                                                             | EMS   | Did Not Participate | N/A   |
| <b>SURINAME</b>              | Independent Electoral Council                                                                                                                                                                | ELECT | Did Not Participate | N/A   |
| <b>SWEDEN</b>                | Election Authority                                                                                                                                                                           | EMS   | 77                  | EMS   |
| <b>SWITZERLAND</b>           | Federal Chancellery, Political Rights Section                                                                                                                                                | EMS   | 7                   | EMS   |
| <b>TAIWAN</b>                | Central Election Commission                                                                                                                                                                  | EMS   | Did Not Participate | N/A   |
| <b>TANZANIA</b>              | National Electoral Commission                                                                                                                                                                | ELECT | Did Not Participate | N/A   |
| <b>THAILAND</b>              | Election Commission                                                                                                                                                                          | ELECT | Did Not Participate | N/A   |
| <b>TIMOR-LESTE</b>           | National Election Commission                                                                                                                                                                 | EMS   | 3                   | ELECT |
| <b>TOGO</b>                  | Did Not Participate                                                                                                                                                                          | N/A   | 7                   | ELECT |
| <b>TRINIDAD AND TOBAGO</b>   | Elections & Boundaries Commission                                                                                                                                                            | EMS   | Did Not Participate | N/A   |
| <b>TURKEY</b>                | Higher Elections Committee                                                                                                                                                                   | EMS   | Did Not Participate | N/A   |
| <b>UNITED KINGDOM</b>        | Did Not Participate                                                                                                                                                                          | N/A   | 244                 | EMS   |
| <b>ZIMBABWE</b>              | Electoral Commission                                                                                                                                                                         | ELECT | Did Not Participate | N/A   |

### Datasets:

James, Toby S.; Garnett, Holly Ann; Loeber, Leontine; van Ham, Carolien, 2018, "Electoral Management Survey" available from [www.electoralmanagement.com](http://www.electoralmanagement.com)

Norris, Pippa; Nai, Alessandro; Karp, Jeffrey, 2016, "Electoral Learning and Capacity Building (ELECT) data", <https://doi.org/10.7910/DVN/MQCI3U>, Harvard Dataverse, V1, UNF:6:SXFqE3iejlCpbbq+N9xHYg==
